# Supplementary material
Source: bioRxiv or medRxiv preprint supplement (https://www.biorxiv.org/highwire/filestream/72414/field_highwire_adjunct_files/0/237008-1.pdf)
Supplement: Supplementary file [file 237008-1.pdf]

**Supplementary Material for**

**Title: Spatial organization of single mRNPs at different stages along the gene expression pathway**

Srivathsan Adivarahan<sup>1</sup>, Samir Rahman<sup>1</sup> and Daniel Zenklusen<sup>1\*</sup>

(1) Département de Biochimie et médecine moléculaire, Université de Montréal,  
Montréal, Québec, Canada

**\*Corresponding author: [daniel.r.zenklusen@umontreal.ca](mailto:daniel.r.zenklusen@umontreal.ca)**

**This document includes:**

Materials and Methods  
Figs. S1 to S4  
Tables S1 + S2

## **MATERIALS AND METHODS**

### **Reagents Used, stock concentrations, working concentrations and treatment conditions:**

Puromycin dihydrochloride (Sigma P8833) – stock at 5 mg/ml in water, Cycloheximide (Sigma C7698-1G) – stock 5 mg/ml in ethanol, Sodium Arsenite (Sigma 35000-1L-R) – stock 50 mM in water. The drugs were diluted in warm media to get final working concentrations and cells were treated prior to fixation as follows: Puromycin (100 µg/ml for 10 min), Cycloheximide (100 µg/ml for 10 min) and Sodium Arsenite (2 mM for 1 hour).

**Cell culture and drug treatment:** HEK293 and U2OS osteosarcoma cell lines were maintained at 37°C and 5% CO<sub>2</sub> in Dulbecco's Modified Eagle Medium (DMEM) (Wisent, 319-005-CL) supplemented with 10% fetal bovine serum (FBS) (Wisent, 080-150) and passaged every 2-3 days with Trypsin (Wisent 325-043-EL). Cells were plated on poly-L-Lysine (Sigma, P8920) coated coverslips the day before treatment and fixation. On the day of the experiment, media was replaced with fresh warm media containing drug in indicated concentrations and placed back in the incubator. After treatment, the cells were briefly washed with 1xPBS, fixed with 4% paraformaldehyde (pH 7.2) for 10 minutes at room temperature, washed three times with 1xPBS and stored overnight in 70% ethanol at -20°C.

**smRNA FISH:** Custom DNA probe sets were designed using Stellaris<sup>®</sup> Probe Designer, synthesized by Biosearch Technologies containing 3' amine reactive group and labeled with far red dye Cy5 (GEPA25001), red dyes Cy3 (GEPA23001) from Sigma or Dylight 550 (Thermo Scientific 62263) or green dye Dy488 (Thermo Scientific 46403) as described in(1). Probe sequences are shown in Supplemental Table 1. smFISH was done as described in (2). Prior to hybridization, cells are rehydrated in 1xPBS, then washed with 10% formamide/2xSSC for 10

minutes at room temperature. The cells were hybridized with 10-20 ng of each probe mix plus 40  $\mu\text{g}$  of ssDNA/tRNA resuspended in the hybridization solution (10% dextran sulfate/10% formamide/2xSSC/2 mM VRC/0.1 mg/ml BSA) for 3 hours in the dark at 37°C. Post hybridization washes (2x 30 min) were carried out at 37°C with 10% formamide/2xSSC. Samples were then rinsed with 1xPBS and mounted with ProLong Gold antifade reagent with DAPI (P36935, Invitrogen).

**Image Acquisition and pixel shift correction:** Images were acquired with a 63x NA 1.46 oil objective on a Zeiss Elyra PS.1 system equipped with an Andor EMCCD iXon3 DU-885 CSO VP461 camera (1004x1002 pixels), the following filter sets: DAPI: BP420-480 + LP750 (Zeiss SR cube 07), Cy2: BP495-590+LP750 (Zeiss SR cube 13), Cy3: LP570 (Zeiss SR cube 14), Cy5: LP655 (Zeiss SR cube 10) and the following lasers: 50 mW 405 nm HR diode, 100 mW 488 nm HR diode, 100 mW 561 nm HR DPSS, 150 mW 642 nm HR diode. Each image was acquired using 3 rotations and a grid size of 42  $\mu\text{m}$  for all channels. The microscope was located in a temperature controlled room and samples were kept in the room for at least an hour before imaging to minimize thermal fluctuations. To correct for pixel shifts between channels, 0.1  $\mu\text{m}$  TetraSpec beads (Invitrogen T-7279) were imaged in all channels and the channel shift values were calculated and corrected using the built-in channel alignment tool in ZEN 2012 SP5.

**RNA spot detection, spot assignment and distance measurements:** For image analysis, 3D datasets were reduced to 2D data using maximum projections in FiJi. Spot detection was done by 2D Gaussian fitting as described in (3, 4). To separate cytoplasmic and nuclear mRNPs, masks were created in FiJi by manual segmentation using DAPI stained nuclei as reference, while ensuring that regions with overlapping spots within the same channel were not included. Assignment of the 5', 3' and/or the mid spots to either the cytoplasmic or the nuclear masks was

done using MATLAB. To measure distances between different regions of mRNPs, spots from different channels were first grouped to assign neighboring spots corresponding a single RNA. This was achieved by using spots from one channel as a reference, and finding spots from the other channels within a radius of 300nm using the coordinates from 2D Gaussian fitting using a custom MATLAB script. 300nm were chosen to limit assigning signals from neighboring RNAs. Groups with more than one spot from each channel, which could correspond to overlapping mRNPs or mRNPs close together in space, were discarded. For 2 color imaging, the 5' signal was taken as reference and for 3 color imaging, the middle was taken as reference. Switching references yielded comparable results (not shown). 2D distance between different regions of the mRNP were then calculated for each signal within a group.

**Plotting:** All measurements were made for at least 2 independent biological replicates and the data plotted are representative from one of the replicates. For each measurement, at least 5 different fields were imaged with each image containing a minimum of 10 cells to make a total of at least 50 cells. A minimum of 940 RNAs were considered for cytoplasmic plots and a minimum of 430 RNAs were considered for the nuclear plots, unless mentioned otherwise. The center of mass plots in Fig. 1G, 2D, 4D were made using R. The center of mass was calculated as the mean of the coordinates of the three regions. The different conformations were then aligned using their center of masses. For the 3-color scatter plot in Fig. 2E, 4E and S4, to get a pair of co-localization precision values, two values were chosen randomly from our data. These values were taken as the X and Y coordinates for the scatter plot. The values that served as the X and Y coordinates were used to get density plots in the same figure. The mean Radius of gyration ( $\langle R_g \rangle$ ) was calculated using:

$$\langle R_g \rangle = \sqrt{\frac{1}{3} \sum_{k=1}^3 (r_k - r_{mean})^2}$$

where  $k$  represents one of the three regions of the mRNP and  $r_k$  the position of the corresponding position in space as determined by 2D Gaussian fitting.

## Supplementary Figures

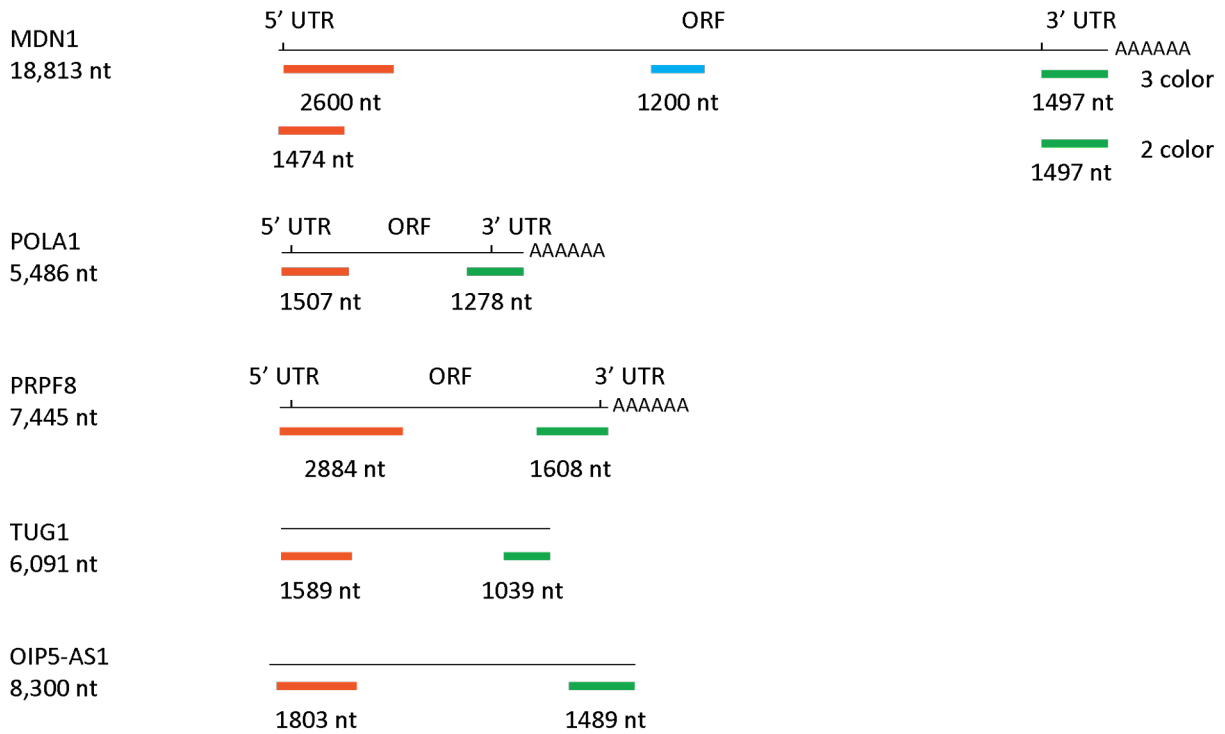

Adivarahan et al. Figure S1

**Figure S1: Positions of smFISH probes used in this study.** Cartoons illustrating the positions of the probes used for the different genes used. See Supplemental Table 1 for probe sequences.

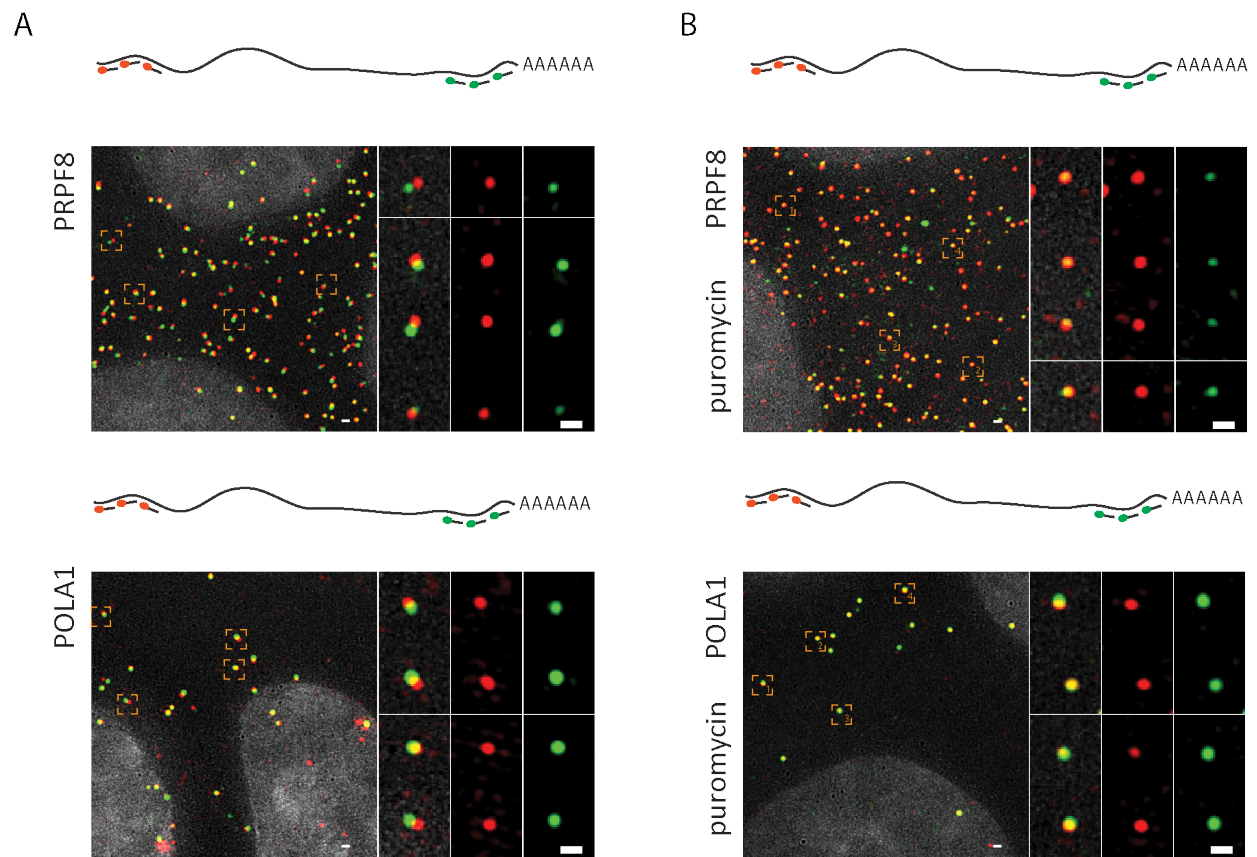

Adivarahan et al. Figure S2

**Figure S2: Visualizing mRNP conformation of single POLA1 and PRPF8 mRNAs. (A and B)** smFISH images using probes hybridizing to the 5' and 3' ends of PRPF8 and POLA1 mRNAs in paraformaldehyde fixed HEK293 cells, either untreated (A) or treated with puromycin (10 min, 100  $\mu\text{g/ml}$ ) (B). Nuclei are visualized by DAPI staining (grey). Magnified images of individual RNAs marked by dashed squares are shown on the right. Schematic position of probes shown on top. Scale bars, 500 nm.

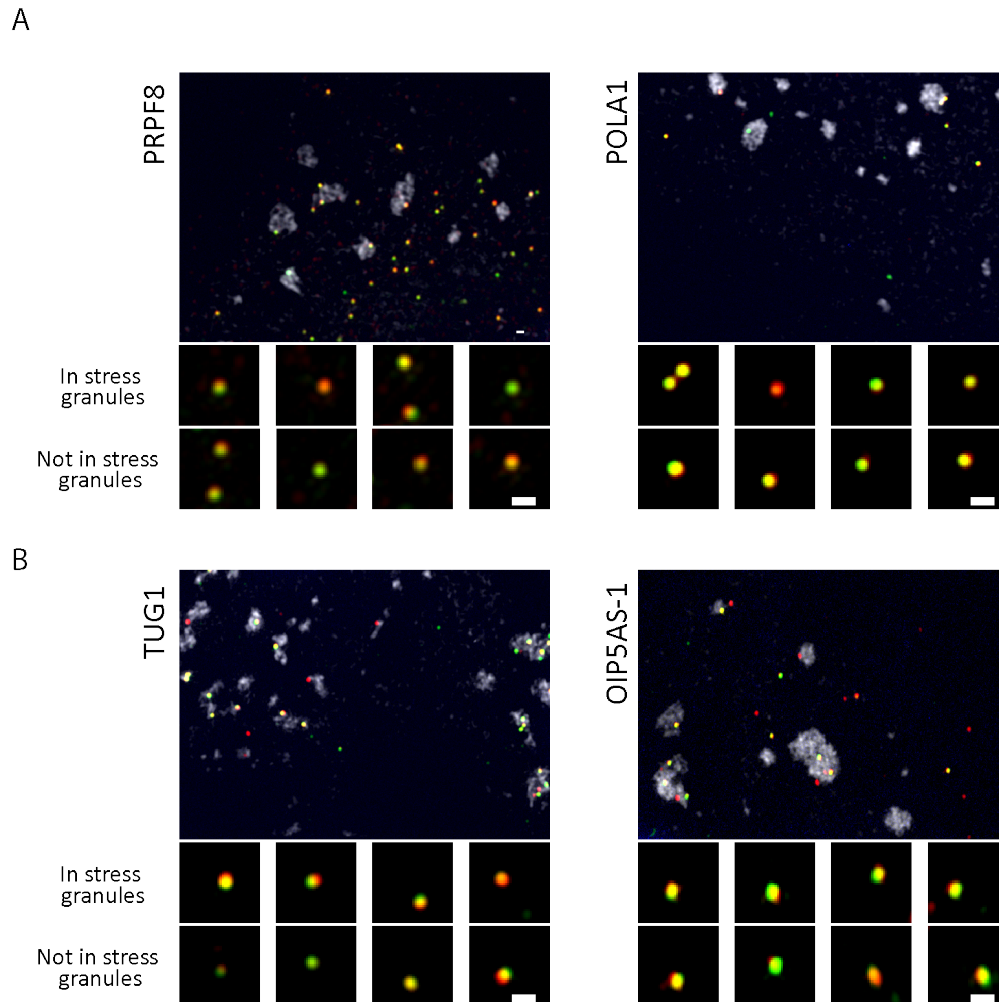

Adivarahan et al. Figure S3

**Figure S3: mRNA and lncRNA compaction and accumulation in stress granules.** smFISH visualizing 5' and 3' ends of PRPF8 and POLA1 mRNAs (A) or TUG1 and OIP5-AS1 lncRNAs (B) in U2OS cells treated with arsenite (1 hour, 2 mM). Only a selected cytoplasmic region of cells is shown. Stress granules are visualized using an oligo dT probe (grey). Magnified images of individual RNAs localized inside or outside of stress granules are shown on the bottom of the images. For POLA1 and OIP5-AS1, not all magnified single RNAs shown in the bottom are from the corresponding image above. Scale bars, 500 nm.



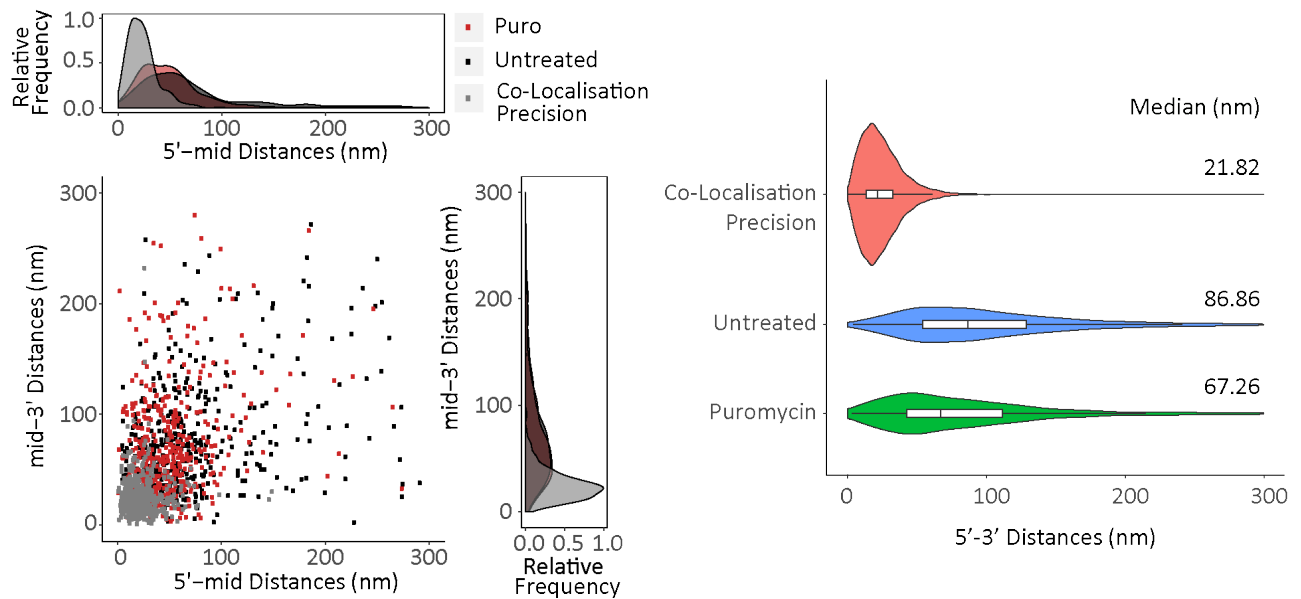

Adivarahan et al. Figure S4

**Figure S4: Compaction of nuclear MDN1 mRNA is not altered upon puromycin treatment.** (Left) Scatter plot showing 5'- mid and mid-3' distances for individual nuclear MDN1 mRNAs from untreated cells (black) and cells treated with puromycin (red). Co-localization precision is shown in grey. Frequency distribution are shown on top and on the right. (Right) Violin plots showing distance distribution of co-localization precision and 5'-3' distances for MDN1 mRNAs determined by Gaussian fitting from untreated, puromycin or arsenite treated HEK293 cells. White box plot inside the violin plot shows first quartile, median and third quartile. Median distances are shown on the right.

## Tables

**Table S1:** List of probes used

|         |                      |          |                       |
|---------|----------------------|----------|-----------------------|
| MDN1 5' | tcgttcttggetgcgattaa | POLA1 3' | tgtacagggacttgcagaa   |
| MDN1 5' | taaggtactcaggacacact | POLA1 3' | taccggtaaaagcacagctg  |
| MDN1 5' | cacagtacagtccttatcca | POLA1 3' | gtgcacactccgcatcaaaa  |
| MDN1 5' | agcaaatccaaaaggagagg | POLA1 3' | tctcatgatcggtagtaagt  |
| MDN1 5' | ttgaaagactggggatgtgt | POLA1 3' | ctgtagtcctgcagaacttt  |
| MDN1 5' | gcattcgaactctctaggaa | POLA1 3' | ctctgtctgttcttgagtt   |
| MDN1 5' | gtgctcttcattcatacagg | POLA1 3' | tagccacttcgggacaagaa  |
| MDN1 5' | cctcaacctgaaatggatca | POLA1 3' | ttgctcagattcacttcgg   |
| MDN1 5' | aaaaccaaggccttctccaa | POLA1 3' | ttaggatttcacggcacaac  |
| MDN1 5' | aaagggagactcttgattg  | POLA1 3' | cttggttactcctgggattc  |
| MDN1 5' | tcagacgaacaagatgtcc  | POLA1 3' | ggaagctgggattttcaac   |
| MDN1 5' | accagcacataagacctaag | POLA1 3' | caagggagaaacagatgctg  |
| MDN1 5' | gaagactttgcagacagac  | POLA1 3' | acacaaacatgagacacagt  |
| MDN1 5' | acagcattctgagaagcaac | POLA1 3' | gactcaacattttgcagcc   |
| MDN1 5' | tcctattggctctccaaca  | POLA1 3' | ctcagaaaaccgggtctcag  |
| MDN1 5' | cctgtcactgcagctaaata | POLA1 3' | gctactctcaatccaagtag  |
| MDN1 5' | aagctggactttgagaagct | POLA1 3' | gcctggggctcacttacattc |
| MDN1 5' | acatctgtgcagcgatacat | POLA1 3' | cataggctaaaggccctgag  |
| MDN1 5' | atatcctccagaaggatcca | POLA1 3' | ttcagtcaggctctgagaag  |
| MDN1 5' | aagagctctccattctccaa | POLA1 3' | tgaaaaagcaaacgtcagc   |
| MDN1 5' | aaatccaggtgccactttca | POLA1 3' | ttagaccgggttaattggc   |
| MDN1 5' | caactacgcccgcaggaaag | POLA1 3' | actcctggatggctggagaa  |
| MDN1 5' | agcaagaagtgtccatgac  | POLA1 3' | agacaagactgaaaaggaca  |
| MDN1 5' | caagaacctgcccactcac  | POLA1 3' | agtgaaggcttctaatact   |
| MDN1 5' | cgatcttgagggtgccacac | POLA1 3' | gagcaattcaacaacaagc   |
| MDN1 5' | aatggcttcggcattccttt | POLA1 3' | cagtgtgtgtctgttgact   |
| MDN1 5' | gttcatgcagatcatggttg | POLA1 3' | atgtgagtgtaaaacacctg  |
| MDN1 5' | gtttgctcatcgacacacat | POLA1 3' | gcacttctatttaaggggc   |
| MDN1 5' | gacatcaggatggttaccaa | POLA1 3' | ccctacacatgtaatggat   |
| MDN1 5' | aatatctcagggcaaacggg | POLA1 3' | tgaatacaacacagtgatcc  |
| MDN1 5' | tacgtccatagegtactgga | POLA1 3' | ggccaattaagcatccctct  |
| MDN1 5' | gcagaaacttgaaggetgct | POLA1 3' | agaaaaaaatagcaagcgcc  |
| MDN1 5' | cggaacacagactgctcctg | POLA1 3' | agacggctctattgtgaaga  |
| MDN1 5' | aaggtgtcatggctctgag  | POLA1 3' | aaatacattttgctgtgcc   |
| MDN1 5' | acaattggctgtataccagc | POLA1 3' | agagaggaaagactgccata  |

|             |                      |          |                      |
|-------------|----------------------|----------|----------------------|
| MDN1 5'     | acaccacaaacagctgtcac | POLA1 3' | cagcataattgtacaagggg |
| MDN1 5'     | tcttaactgtcagctgatct | POLA1 3' | agaagaaggcacaacatact |
| MDN1 5'     | gaagaactcctattaccacc | POLA1 5' | aactccctgaatctgacaga |
| MDN1 5'     | ctgccacacaaactctccag | POLA1 5' | ttgattttttctcgccgg   |
| MDN1 5'     | cagaaaccacgtctaagggg | POLA1 5' | ttctagggcttcttgccgc  |
| MDN1 5'     | caatttctccacagctcaa  | POLA1 5' | ccagcttagccttttcag   |
| MDN1 middle | aagcagcaagattgaccaca | POLA1 5' | taaacacctgtgaagtcctc |
| MDN1 middle | ggactagtgcatacaaaagt | POLA1 5' | cctgaaccagcttccaatac |
| MDN1 middle | actggcatcagacaccattc | POLA1 5' | caatccagtcatacctgg   |
| MDN1 middle | accgcagagaacctaaagtc | POLA1 5' | ggcatcatcttcaaggtcat |
| MDN1 middle | ggcatctactttactgtgt  | POLA1 5' | tcttgctttattgcgtgct  |
| MDN1 middle | tgccaatggagggaagaag  | POLA1 5' | cactgcgagctctttacat  |
| MDN1 middle | ctgggtgaccagatgttta  | POLA1 5' | tctgcagtttcttccagc   |
| MDN1 middle | aattcatcagaagtcggggg | POLA1 5' | accatccttgacaagtcta  |
| MDN1 middle | ctgagacagctgaacttct  | POLA1 5' | cctgtagaatgcacctagc  |
| MDN1 middle | tccccagacaattctgaata | POLA1 5' | tcagtatcattacaggtggt |
| MDN1 middle | cttcttataaccagcgaagc | POLA1 5' | tgaagctccaatggatcttt |
| MDN1 middle | aaacggctgtcccaggaact | POLA1 5' | tgtgcacagaaaaggattc  |
| MDN1 middle | ccaccagctgtccttaaaa  | POLA1 5' | gggaagcaattttctgaa   |
| MDN1 middle | ggaccttcagttgtgaaaaa | POLA1 5' | agttaatggaggctcctttc |
| MDN1 middle | ctgatggcaaggactttgtt | POLA1 5' | cagcacgttaagaggaaca  |
| MDN1 middle | agacggttaatgtcttctg  | POLA1 5' | tctcgacctgtacatcatcg |
| MDN1 middle | ccactgagaagcaaccactt | POLA1 5' | tgactcctgtcttcttctg  |
| MDN1 middle | cttgaggagacttttctt   | POLA1 5' | ggctcatcaaagtcaccatc |
| MDN1 middle | attgctctgaggatcagtc  | POLA1 5' | agccataggtccaggtcca  |
| MDN1 middle | ttcatctaggctgacatctt | POLA1 5' | tcttttgtcccaagccttg  |
| MDN1 middle | ctgagcatgcacaaaattct | POLA1 5' | ttgttctacttctctgctg  |
| MDN1 middle | cctttggcttccagttctaa | POLA1 5' | agtaggacacggctcctttc |
| MDN1 middle | ctccagaaaaccaagtgaga | POLA1 5' | catccgggagaaaacttct  |
| MDN1 middle | aggaagcttcatcatgcttt | POLA1 5' | tgatcaatgtcccaacaaga |
| MDN1 middle | gtcaagtctggatgggacag | POLA1 5' | tgactgagaaactgtctatc |
| MDN1 middle | tcttggtgaggtggattacg | POLA1 5' | gactggaatccacttgaact |
| MDN1 middle | attgcaggccacaactgaac | POLA1 5' | gcccctttaccaatgggag  |
| MDN1 middle | ttgtaccgccaagcatag   | POLA1 5' | agtggaatactgttctca   |
| MDN1 middle | gtgccataaaatcagctgtc | POLA1 5' | ggttggtgtactgatcctc  |
| MDN1 middle | ctgcatctctgagacaagc  | POLA1 5' | ctcggctgattcaatccaaa |
| MDN1 middle | tttatctggggtgttgatt  | POLA1 5' | atgacacaacagctcacatg |
| MDN1 middle | agatgagtgacttatctcc  | POLA1 5' | agcgttcgctgatattttt  |
| MDN1 middle | acaggtgtgtataaagaca  | POLA1 5' | gtttcttccccgtatttag  |
| MDN1 middle | atctcgaagctcttgaggtg | POLA1 5' | gcatagttctttccactgg  |

|             |                      |             |                       |
|-------------|----------------------|-------------|-----------------------|
| MDN1 middle | tgatgatgcagcaaggacca | POLA1 5'    | ctggaacatcaggtatctca  |
| MDN1 middle | aatttcttcaggagacacct | POLA1 5'    | aatcttgaggaaagctgtggc |
| MDN1 middle | ataactcggaccacaaagat | POLA1 5'    | agatgtgttggtcccaata   |
| MDN1 middle | agtactctccagaagaca   | OIP5-AS1 5' | acgggaaagtaactgggtaa  |
| MDN1 middle | agtactctggatttggtc   | OIP5-AS1 5' | gaagtgatagccacattca   |
| MDN1 middle | ggcaaagggtccacattag  | OIP5-AS1 5' | ccaatcatggaggaatgt    |
| MDN1 middle | tccaaacagacttggtgc   | OIP5-AS1 5' | aagaaaagtggtctttcca   |
| MDN1 middle | tggtctattgagattgccg  | OIP5-AS1 5' | ctcctctgttgaattga     |
| MDN1 middle | tcaaagcagcacttagagaa | OIP5-AS1 5' | agcaggataactggaatcct  |
| MDN1 middle | tctccagctgctggtaaga  | OIP5-AS1 5' | cttcttctctctggagatg   |
| MDN1 3'     | aagtctcactttggactctt | OIP5-AS1 5' | agcaaaagacctatgtgagt  |
| MDN1 3'     | aatgtgaccttctgaccaca | OIP5-AS1 5' | agccttctgcttcaaaatg   |
| MDN1 3'     | aaaagggagcacctgggtaa | OIP5-AS1 5' | gcacctgttcaaatgaaac   |
| MDN1 3'     | agcattctgtagctgtaag  | OIP5-AS1 5' | attcaaaataccaccacct   |
| MDN1 3'     | tggtataaaacctcagccc  | OIP5-AS1 5' | cttcttagtcttctgctt    |
| MDN1 3'     | acttctctagttacagagt  | OIP5-AS1 5' | ccctgaagtcattcatactt  |
| MDN1 3'     | ctccaaggcagggaagaag  | OIP5-AS1 5' | gtggctgaaactggaagaca  |
| MDN1 3'     | aagaaaacaggcagctgggc | OIP5-AS1 5' | ctcaactgtgcttatcatgg  |
| MDN1 3'     | acaaggactgtcagagtcc  | OIP5-AS1 5' | atttggaaattactgctgca  |
| MDN1 3'     | aaaagggcagctcccttag  | OIP5-AS1 5' | ttttagtatcttcacgtca   |
| MDN1 3'     | gcaaggcagagcttagaaca | OIP5-AS1 5' | caggatgagccaggatttaa  |
| MDN1 3'     | tttgggcacacactatgggc | OIP5-AS1 5' | gttctattcagtaaatcta   |
| MDN1 3'     | ctgtcttgccactgacag   | OIP5-AS1 5' | tttgtttaaattgggcct    |
| MDN1 3'     | cctcactctccagaaacg   | OIP5-AS1 5' | aactcctctatgtccaaagt  |
| MDN1 3'     | tctaagagaaggtagtctct | OIP5-AS1 5' | ggaaaattctctcctctcc   |
| MDN1 3'     | ctataatgtccagttgcttt | OIP5-AS1 5' | catgagggattttgcttct   |
| MDN1 3'     | ttttatagatgacctgggc  | OIP5-AS1 5' | caccataaagtcagatggca  |
| MDN1 3'     | ttttacacagccaaggat   | OIP5-AS1 5' | gggttgaggaaagagttaat  |
| MDN1 3'     | gaggatactgaaaagccact | OIP5-AS1 5' | caaacatccaagtatccacc  |
| MDN1 3'     | cattgcatagtctcccgaag | OIP5-AS1 5' | ccttttcagcctagaaatca  |
| MDN1 3'     | ataaaggggcaatcaccttc | OIP5-AS1 5' | ctggggaaagtacctgagtc  |
| MDN1 3'     | tacaacaacaggaccatgg  | OIP5-AS1 5' | tgatgagaaagttcagtccc  |
| MDN1 3'     | agtgtgaggaatcactcttc | OIP5-AS1 5' | tgggaacattgcttctgagg  |
| MDN1 3'     | tggtcagctccagcttgaag | OIP5-AS1 5' | cacgatgaccaaccacaag   |
| MDN1 3'     | cgttcttcccagaatgag   | OIP5-AS1 5' | ttctatttgaggttcttt    |
| MDN1 3'     | atagatggagctgctgagtt | OIP5-AS1 5' | ttctacgacagtctgttctt  |
| MDN1 3'     | atcagttcttctgactgga  | OIP5-AS1 5' | gctgatttggagcaagac    |
| MDN1 3'     | ggccaagtaaaaactgcta  | OIP5-AS1 5' | acaatacataaatggctct   |
| MDN1 3'     | caagtattcagcactgcttt | OIP5-AS1 3' | accacagatctgtcagatt   |
| MDN1 3'     | agtagaacagagcacacagt | OIP5-AS1 3' | gccaacccatcaaggataa   |

|             |                       |             |                       |
|-------------|-----------------------|-------------|-----------------------|
| MDN1 3'     | atcatgacatactgcctaca  | OIP5-AS1 3' | gctttagtcaagaaattgca  |
| MDN1 3'     | tcgcagacttcacagtgtaa  | OIP5-AS1 3' | aagtttctctgtttaacct   |
| MDN1 3'     | atctgtgtctttgatgacca  | OIP5-AS1 3' | gcaaggattttcttctagt   |
| MDN1 3'     | tacatgctttgggacacttg  | OIP5-AS1 3' | gcaaggattttcttctattg  |
| MDN1 3'     | aagatcagtcacctagcata  | OIP5-AS1 3' | gtcaggaattttctcaagga  |
| MDN1 3'     | ctgactgactgatccagcag  | OIP5-AS1 3' | gtgcacaatcactgtactt   |
| MDN1 3'     | gcacagcatcaactagtaac  | OIP5-AS1 3' | tgaatgccattttacgtca   |
| MDN1 3'     | gaagtaggaggggatcatgt  | OIP5-AS1 3' | tttaggctgtttcagacat   |
| MDN1 3'     | cctttgtagtaagagcaaca  | OIP5-AS1 3' | accttgaatgtgctttgtga  |
| MDN1 3'     | cagcctaccatggacataaa  | OIP5-AS1 3' | tcccaaagttattgtagca   |
| MDN1 3'     | ctgcaaagccagcatattat  | OIP5-AS1 3' | gttaccattccactttatc   |
| MDN1 3'     | gcctcctataaggctacac   | OIP5-AS1 3' | ttcaattctgaaccactgga  |
| MDN1 tiling | acacacactgcaagctgctc  | OIP5-AS1 3' | accaaactcacagtcacaa   |
| MDN1 tiling | ctggagcagccaagttaatc  | OIP5-AS1 3' | ggatatgacatctcacttca  |
| MDN1 tiling | agagtgagcgtgaatgttg   | OIP5-AS1 3' | tgtatcaagtaattgggga   |
| MDN1 tiling | ccctgtcaagctgtgttaag  | OIP5-AS1 3' | gttcttaactttactggct   |
| MDN1 tiling | ttcacggttatcatccaaca  | OIP5-AS1 3' | gccttagtggataatcgga   |
| MDN1 tiling | tctgtgtttctgttactag   | OIP5-AS1 3' | tgatgtctggtttcccaaaa  |
| MDN1 tiling | agttacactccaatgtggat  | OIP5-AS1 3' | gatttaggacttcatggaga  |
| MDN1 tiling | ctcagtcacacgatatggc   | OIP5-AS1 3' | agatacctattctgacttta  |
| MDN1 tiling | ccatatttctgtaaaccggt  | OIP5-AS1 3' | acctgaatactgtcagtaac  |
| MDN1 tiling | taaatcttcacggctgtgctc | OIP5-AS1 3' | tgacatatccaagggaga    |
| MDN1 tiling | attattctgtgtaggacag   | OIP5-AS1 3' | tcctgggagaaaatatttt   |
| MDN1 tiling | tgcactgagtgcatagtctg  | OIP5-AS1 3' | gtattaccagaatacctttc  |
| MDN1 tiling | ccccaaaatcttctgtttt   | OIP5-AS1 3' | tgccaagactgttactgttt  |
| MDN1 tiling | cttgctaaaggattctga    | OIP5-AS1 3' | gaaatgggtcggttttgtga  |
| MDN1 tiling | aatgactgggtgcaggagcaa | OIP5-AS1 3' | attcttacaaggcagtaggt  |
| MDN1 tiling | tcactctgcacacacttcag  | OIP5-AS1 3' | gtaaacacagtgagcaactc  |
| MDN1 tiling | caactgcgtaagcttcacac  | OIP5-AS1 3' | tggagaatattggaggacagc |
| MDN1 tiling | tcaaatgtgccatggctatg  | OIP5-AS1 3' | acgttataccaatgggtgc   |
| MDN1 tiling | gcaggtactggacaattagt  | OIP5-AS1 3' | aagcaagctgccttttgtaa  |
| MDN1 tiling | aggctctgtctaaactcagc  | OIP5-AS1 3' | accccaaagatgcatagatt  |
| MDN1 tiling | agccatttaactctgagcat  | OIP5-AS1 3' | ccaactttttaacagtcc    |
| MDN1 tiling | gcggtatattcttggtctaaa | TUG1 5'     | cactaaggcggcataaggag  |
| MDN1 tiling | ggactagtgcatacaaaagt  | TUG1 5'     | acccacacacattgatagg   |
| MDN1 tiling | actggcatcagacaccattc  | TUG1 5'     | tttgaagggtcccaaatga   |
| MDN1 tiling | gttctaaacactgagcatgc  | TUG1 5'     | ggactcaaacagggttcaa   |
| MDN1 tiling | aaccaagtgcagagctctttg | TUG1 5'     | agaacagctccatatccc    |
| MDN1 tiling | ggcaaagggtccacattag   | TUG1 5'     | aaccccgaatatccattatg  |
| MDN1 tiling | tccaaaacagacttgggtgc  | TUG1 5'     | aatagaagccaagcagggga  |

|                    |                      |         |                       |
|--------------------|----------------------|---------|-----------------------|
| MDN1 tiling        | gaggtgagcaactggcagag | TUG1 5' | ccccatggtgaaagaaaagg  |
| MDN1 tiling        | ttaccaacaaagtgggtca  | TUG1 5' | attgtaccatgatgcacgc   |
| MDN1 tiling        | tttagaaggctctgggctac | TUG1 5' | tcctaattgtagctgcttta  |
| MDN1 tiling        | cggaactggtggtgtgactg | TUG1 5' | ggatgctacagaacacatcc  |
| MDN1 tiling        | acatgtctgaagagctgcag | TUG1 5' | gttgacgggccaaggataa   |
| MDN1 tiling        | ttctctgggctatgcgttc  | TUG1 5' | accagtacaagcagcagata  |
| MDN1 tiling        | tagaagtcatagggccatc  | TUG1 5' | tatggtaaatgagagtcaga  |
| MDN1 tiling        | tgcttctggaacattgggat | TUG1 5' | atggatgacaacctggtcg   |
| MDN1 tiling        | gcaacatcaaggtcatctgt | TUG1 5' | cctagacatgtaaagtagga  |
| MDN1 tiling        | aagtgcacatggaactctc  | TUG1 5' | ctattcaccaccaaccacac  |
| MDN1 tiling        | ctgacaccactctggaattg | TUG1 5' | ctggcagcaccatgtaaaaa  |
| MDN1 tiling        | tttgcaagcgacgcagaag  | TUG1 5' | cgtgcaccattaattagctg  |
| MDN1 tiling        | gttgctagtgctgcgttaag | TUG1 5' | tgagccccgttctaaagt    |
| MDN1 tiling        | aatgtgctgagaacctctg  | TUG1 5' | aattccatgccagggtcagt  |
| MDN1 tiling        | cagctgactccaggtattg  | TUG1 5' | aaaaaccccaaacatcttca  |
| MDN1 tiling        | caaaggtgatcctgtttccg | TUG1 5' | ctactgatttgagggtccg   |
| MDN1 tiling        | cataatcttctgtgggctt  | TUG1 5' | ttagctttgaatcactcca   |
| MDN1 tiling        | ttagatgctctgattgcagt | TUG1 5' | agaacacaaggaggggccaag |
| MDN1 tiling        | ccctctgaaatgtatcttc  | TUG1 5' | tcctagtattacacttgcaa  |
| MDN1 tiling        | tcgcccttaatatcagattt | TUG1 5' | gcaaaaactggcatcttggga |
| MDN1 tiling        | ccacctcattttcatcatag | TUG1 5' | ttgttggaataatggcctga  |
| MDN1 tiling        | ttctgattgccatggttaag | TUG1 5' | tgagcaccactccacaaaaac |
| MDN1 tiling        | ggccaactgggcaatgaaat | TUG1 5' | atgtgtttgtgtcacttgc   |
| MDN1 tiling        | ttttctctggtgtgctctg  | TUG1 5' | agcataactggctaacatct  |
| MDN1 tiling        | gtaactctgccacatctcag | TUG1 5' | tctctgccctttaggaaaag  |
| MDN1 tiling        | gtgaaagaggcgtgttaag  | TUG1 5' | gtcatttctctggaagtgag  |
| MDN1 tiling        | gagcagctgcaaacatgttg | TUG1 5' | accaacacttttttctcc    |
| MDN1 tiling        | aactgatgttctgcgagagc | TUG1 5' | gaggtacatccggatttaat  |
| MDN1 5' additional | atgaectgttagcggtcgat | TUG1 5' | tcaccacagtettaagtctt  |
| MDN1 5' additional | ccaggtgaattttggcca   | TUG1 5' | ttctgctgaggaaagcatct  |
| MDN1 5' additional | cagttctctttatccaggt  | TUG1 3' | gagtgacagggtcagcagag  |
| MDN1 5' additional | gtttctctccagtaagtgg  | TUG1 3' | gtttaggagtctatgctaca  |
| MDN1 5' additional | gaaactatcactccaagagt | TUG1 3' | cctcaatcagactgagggtt  |
| MDN1 5' additional | aacttctcaggtgcctgtt  | TUG1 3' | acttccagctcaggagaagg  |
| MDN1 5' additional | ctcaagggttggtctttgt  | TUG1 3' | tttctgctcatctgccaaa   |
| MDN1 5' additional | gggcaatcctattacaccaa | TUG1 3' | agtcaggfacatcagctttc  |
| MDN1 5' additional | ctcagaagcattgctgtga  | TUG1 3' | ggatacagtttctgatctt   |
| MDN1 5' additional | gctccaataacttctgcca  | TUG1 3' | ggtaatccatagggttat    |
| MDN1 5' additional | tttgctgacacacactgcaa | TUG1 3' | gtttttactctgggtactca  |
| MDN1 5' additional | atggtagagggtttgccagt | TUG1 3' | ccagcagatcaataaggaag  |

|                    |                      |          |                       |
|--------------------|----------------------|----------|-----------------------|
| MDN1 5' additional | cctgtaatgtgagccaagta | TUG1 3'  | gccagaatatgatctggaag  |
| MDN1 5' additional | attgacaaccctcaaacggt | TUG1 3'  | agaaaaggccagccataccea |
| MDN1 5' additional | gcaagtctgcagtatcactt | TUG1 3'  | aatagacaagcagggtacct  |
| MDN1 5' additional | atggtcaccgggttataac  | TUG1 3'  | aaaggcaggcaagagctgag  |
| MDN1 5' additional | gtaagggtagccaaataagc | TUG1 3'  | gtctaattgcagcaacatgt  |
| MDN1 5' additional | aagagttcctcaaatgcctc | TUG1 3'  | aattgactgtagtcctcacg  |
| MDN1 5' additional | gccccagaacgtaaagt    | TUG1 3'  | aaatccttgtgtattgggc   |
| MDN1 5' additional | ctgtctgtaacaggtctgaa | TUG1 3'  | agggtggtgtgtactatt    |
| MDN1 5' additional | ttagtctcaggagatcatgc | TUG1 3'  | gaacattgagtcctagggg   |
| MDN1 5' additional | agcagacttgtgtacatgct | TUG1 3'  | aagttgctggcaaggagta   |
| MDN1 5' additional | caactgtctttccatcctg  | TUG1 3'  | acatacaggaatagaggcct  |
| MDN1 5' additional | ccaaatgcttcccattctc  | TUG1 3'  | agggtccaggtgctgaaaat  |
| MDN1 5' additional | ttgggcatggttgagtctaa | TUG1 3'  | aactgctgtattcctccag   |
| PRPF8 5'           | ctcgataaggaacactccg  | TUG1 3'  | agagaaatggacgcggcttt  |
| PRPF8 5'           | caattgctgccatttctgag | TUG1 3'  | actcattctgcactactga   |
| PRPF8 5'           | acttccgcttttctgcatag | TUG1 3'  | tctgtgtgactgggtaatc   |
| PRPF8 5'           | tggtctcgaatgatcttct  | TUG1 3'  | tgctaggtgaaactggtaca  |
| PRPF8 5'           | aacttctgttggtcatgct  | TUG1 3'  | acagtggaaacttttctct   |
| PRPF8 5'           | catgttctccaggagtttga | TUG1 3'  | ctgtgaggcaatttgagtca  |
| PRPF8 5'           | attgacgaaggaaatggctc | TUG1 3'  | acaactagccttctacatca  |
| PRPF8 5'           | gtagacaggttcaatgacc  | TUG1 3'  | aactgtctgctgatctgaa   |
| PRPF8 5'           | tttctcggcgcataataat  | TUG1 3'  | agtggcatgagtctgagag   |
| PRPF8 5'           | ggaaaacgcatcctcttgaa | TUG1 3'  | ccacagtttaacacaagca   |
| PRPF8 5'           | cggtcctcatcatcaaaag  | TUG1 3'  | gtccaatgcatatgttggga  |
| PRPF8 5'           | ggatgtgtcagcatagtc   | TUG1 3'  | cctcaagaagtctgtaatcc  |
| PRPF8 5'           | ggcatagaaccagtccaac  | TUG1 3'  | atgagagataagttgtcct   |
| PRPF8 5'           | tggtaatggagccatttac  | TUG1 3'  | gtttctccttggtataaaa   |
| PRPF8 5'           | cggtagagagtcgacatcat | TUG1 3'  | ttgaatggtaacagctggca  |
| PRPF8 5'           | agtctgtcaggagctgatta | TUG1 3'  | agcttaatctctgcttaaga  |
| PRPF8 5'           | gacgtaagaaggcctcaa   | PRPF8 3' | gtgacaatgatctgcttggg  |
| PRPF8 5'           | caggaatggccatattgagt | PRPF8 3' | gtgggtccagcatgcccttc  |
| PRPF8 5'           | gtctcgaacaagaggttcaa | PRPF8 3' | gggaagtccagtaagtgcac  |
| PRPF8 5'           | ctgccgatgataatcttgt  | PRPF8 3' | ctccgatcctttgatgacaa  |
| PRPF8 5'           | tctgtactcagtcggata   | PRPF8 3' | cttgagacacgcctggaaag  |
| PRPF8 5'           | aagtagaaagctggcaagtc | PRPF8 3' | tgagatccccgaattttcc   |
| PRPF8 5'           | gggagctcaaattcctcatc | PRPF8 3' | ctggggctcagtgctttaa   |
| PRPF8 5'           | ccattggctgtattgtctgt | PRPF8 3' | catagaggtgaagagaacc   |
| PRPF8 5'           | cttaagcagcttctggtagg | PRPF8 3' | tgaatagtcttgaccagt    |
| PRPF8 5'           | cttctttgagccttagggg  | PRPF8 3' | cgcagaatcagatgagacg   |
| PRPF8 5'           | cagctttgtggactgaaaga | PRPF8 3' | atcgtgttcacatgtaggg   |







**Table S2: Probe combinations used**

| <b>Experiment</b> | <b>Combination of Probes and dyes used (From Table S1)</b>                 |
|-------------------|----------------------------------------------------------------------------|
| MDN1 5'-3'        | MDN1 5' -Cy5<br>MDN1 3'- Dy550                                             |
| MDN1 5'-tiling-3' | MDN1 5'+ MDN1 5' additional – Dy488<br>MDN1 tiling – Cy5<br>MDN 3' – Dy550 |
| MDN1 5'-middle-3' | MDN1 5'+ MDN1 5' additional – Dy488<br>MDN1 middle – Cy5<br>MDN 3' – Dy550 |
| PRPF8 5'-3'       | PRPF8 5' -Cy5<br>PRPF8 3'- Cy3                                             |
| POLA1 5'-3'       | POLA1 5' -Cy3<br>POLA1 3'- Cy5                                             |
| TUG1 5'-3'        | TUG1 5' -Cy5<br>TUG1 3'- Cy3                                               |
| OIP5-AS1 5'-3'    | OIP5-AS1 5' -Cy5<br>OIP5-AS1 3'- Cy3                                       |
| MDN1 tiling-3'    | MDN1 tiling + MDN1 tiling additional– Cy5<br>MDN1 3'– Dy550                |
| MDN1 5'-3'-dT     | MDN1 5' -Cy5<br>MDN1 3'- Dy550<br>dT – Cy2                                 |
| MDN1 tiling-3'-dT | MDN1 tiling + MDN1 tiling additional– Cy5<br>MDN1 3'– Dy550<br>dT- Cy2     |
| PRPF8 5'-3'-dT    | PRPF8 5' -Cy5<br>PRPF8 3'- Cy3<br>dT – Cy2                                 |
| POLA1 5'-3'-dT    | POLA1 5' -Cy3<br>POLA1 3'- Cy5<br>dT – Cy2                                 |
| TUG1 5'-3'-dT     | TUG1 5' -Cy5<br>TUG1 3'- Cy3<br>dT – Cy2                                   |
| OIP5-AS1 5'-3'-dT | OIP5-AS1 5' -Cy5<br>OIP5-AS1 3'- Cy3<br>dT – Cy2                           |

## References

1. S. Rahman, D. Zenklusen, in *Imaging Gene Expression* (Humana Press, Totowa, NJ, 2013), vol. 1042 of *Methods in Molecular Biology*, pp. 33–46.
2. S. Rahman *et al.*, Single-cell profiling reveals that eRNA accumulation at enhancer-promoter loops is not required to sustain transcription. *Nucleic Acids Res.* **45**, 3017–3030 (2017).
3. R. Thompson, D. Larson, W. Webb, Precise nanometer localization analysis for individual fluorescent probes. *Biophys J.* **82**, 2775–2783 (2002).
4. D. Zenklusen, D. R. Larson, R. H. Singer, Single-RNA counting reveals alternative modes of gene expression in yeast. *Nat Struct Mol Biol.* **15**, 1263–1271 (2008).
